# Supplementary material for: Evaluating scar outcomes in pediatric patients with burns after skin grafting
Source: Research Square preprint supplement (doi:10.21203/rs.3.rs-6029673/v1), 2025-04-30
Supplement: Supplementary file 1 [file 6337f7be44557aac0cd22854.pdf]

# Evaluating scar outcomes in pediatric patients with burns after skin grafting

Ingrid Steinvall<sup>1\*</sup>, Sharon Kennedy<sup>1, 2</sup>, Matilda Karlsson<sup>1</sup>, Mohamed A. Ellabban<sup>1,3</sup>, Folke Sjöberg<sup>1,4</sup>,

Caroline Andersson<sup>1</sup>, Moustafa Elmasry<sup>1</sup>, Islam Abdelrahman<sup>1</sup>

**Supplemental Table S1 – Change in POSAS Observer categories over time**

| Item         | Category    | 3 months | 12 months | P value |
|--------------|-------------|----------|-----------|---------|
| n            |             | 28       | 23        |         |
| Vascularity  | Red         | 13 (46)  | 0         | <0.001  |
|              | Pink        | 14 (50)  | 17 (74)   | 0.08    |
|              | Pale        | 0        | 5 (22)    | 0.01    |
|              | Mix         | 1 (4)    | 1 (4)     | 1.00    |
| n            |             | 29       | 30        |         |
| Pigmentation | Hyper       | 19 (66)  | 15 (50)   | 0.23    |
|              | Hypo        | 1 (3)    | 5 (17)    | 0.20    |
|              | Mix         | 9 (31)   | 10 (33)   | 0.85    |
| n            |             | 27       | 29        |         |
| Thickness    | Thicker     | 27 (100) | 29 (100)  | -       |
| n            |             | 29       | 30        |         |
| Relief       | More        | 10 (34)  | 11 (37)   | 0.86    |
|              | Less        | 5 (17)   | 3 (10)    | 0.47    |
|              | Mix         | 14 (48)  | 16 (53)   | 0.70    |
| n            |             | 21       | 22        |         |
| Surface area | Contraction | 21 (100) | 18 (82)   | 0.11    |
|              | Mix         | 0        | 4 (18)    | 0.11    |

Data are presented as n (%). Chi-squared or Fisher's exact test. The "n" of each item shows that some assessments were done with no recording of category. The percentages are calculated on the available numbers.

**Supplemental Table S2 – Details of the patients and POSAS values from the 12 months' follow-up grouped by skin graft operation timing**

|                                              | Early              | Late               | p value |
|----------------------------------------------|--------------------|--------------------|---------|
| Patients                                     | 15                 | 15                 |         |
| Age, years                                   | 4.7 (2.3 – 13.0)   | 2.2 (1.4 – 6.0)    | 0.35    |
| Male sex                                     | 6 (40)             | 10 (67)            | 0.14    |
| Skin type I/II/III/IV/V                      | 4/8/3/0/0          | 1/9/3/1/1          | 0.43    |
| Burn type:                                   |                    |                    | 0.02    |
| Scald                                        | 7 (47)             | 13 (87)            | 0.02    |
| Contact burn                                 | 6 (40)             | 0                  | 0.02    |
| Flame burn                                   | 2 (13)             | 2 (13)             | 1.00    |
| Burn size, BSA%                              | 2.5 (0.6 – 10.0)   | 5.0 (3.0 – 7.0)    | 0.62    |
| Superficial dermal burn, BSA%                | 1.0 (0.0 – 5.0)    | 3.0 (0.0 – 5.5)    | 0.84    |
| Deep dermal burn, BSA%                       | 0.8 (0.1 – 2.0)    | 1.0 (0.0 – 2.5)    | 0.65    |
| Full thickness burn, BSA%                    | 0.0 (0.0 – 0.0)    | 0.0 (0.0 – 0.0)    | 0.60    |
| Deep dermal and full thickness burn, BSA%    | 0.8 (0.3 – 2.0)    | 1.2 (0.2 – 2.5)    | 0.57    |
| Operated and skin grafted area, BSA%         | 1.0 (0.6 – 1.0)    | 0.8 (0.5 – 1.5)    | 0.33    |
| Meshed skin graft                            | 8 (53)             | 12 (80)            | 0.12    |
| Days from injury to operation                | 10.0 (6.0 – 12.0)  | 15.0 (14.0 – 18.0) | <0.001  |
| Patients with two operations                 | 4 (27)             | 0                  | 0.10    |
| Antibiotic administration (before operation) | 6 (40)             | 10 (67)            | 0.14    |
| Antibiotic administration (after operation)  | 7 (47)             | 5 (33)             | 0.46    |
| Healing time, days from injury               | 27.0 (24.0 – 40.0) | 28.0 (27.0 – 40.0) | 0.62    |
| Days from operation to healing               | 16.0 (14.0 – 34.0) | 13.0 (9.0 – 26.0)  | 0.02    |
| Vascularity                                  | 2.0 (2.0 – 3.0)    | 1.0 (1.0 – 2.0)    | 0.02    |
| Pigmentation                                 | 3.0 (2.0 – 4.0)    | 2.0 (2.0 – 3.0)    | 0.13    |
| Thickness                                    | 3.0 (2.0 – 4.0)    | 2.0 (2.0 – 2.0)    | 0.01    |
| Relief                                       | 3.0 (3.0 – 4.0)    | 3.0 (2.0 – 4.0)    | 0.25    |
| Surface area                                 | 8.0 (5.0 – 9.0)    | 7.0 (5.0 – 8.0)    | 0.71    |
| Score sum                                    | 18.0 (16.0 – 23.0) | 16.0 (14.0 – 18.0) | 0.045   |

Data are presented as median (25th – 75th centile) and n (%). Mann Whitney U and Chi-squared or Fisher's exact test. Early skin graft operation <14 days after injury, Late skin graft operation ≥14 days.

**Supplemental Table S3 – Details of the patients and POSAS values from the 12 months' follow-up grouped by meshed and not meshed skin graft**

|                                              | Meshed             | Not meshed         | p value |
|----------------------------------------------|--------------------|--------------------|---------|
| Patients                                     | 20                 | 10                 |         |
| Age, years                                   | 2.3 (1.4 – 5.8)    | 5.4 (4.4 – 14.3)   | 0.07    |
| Male sex                                     | 11 (55)            | 5 (50)             | 1.00    |
| Skin type I/II/III/IV/V                      | 2/12/4/1/1         | 3/5/2/0/0          | 0.61    |
| Burn type:                                   |                    |                    | 0.39    |
| Scald                                        | 15 (75)            | 5 (50)             |         |
| Contact burn                                 | 3 (15)             | 3 (30)             |         |
| Flame burn                                   | 2 (10)             | 2 (20)             |         |
| Burn size, BSA%                              | 5.6 (0.9 – 7.2)    | 2.8 (0.7 – 7.0)    | 0.40    |
| Superficial dermal burn, BSA%                | 3.3 (0.0 – 5.0)    | 0.3 (0.0 – 7.0)    | 0.62    |
| Deep dermal burn, BSA%                       | 1.1 (0.1 – 2.4)    | 0.8 (0.1 – 1.1)    | 0.42    |
| Full thickness burn, BSA%                    | 0.0 (0.0 – 0.0)    | 0.0 (0.0 – 0.0)    | 0.78    |
| Deep dermal and full thickness burn, BSA%    | 1.4 (0.4 – 2.5)    | 0.8 (0.2 – 1.1)    | 0.23    |
| Operated and skin grafted area, BSA%         | 0.8 (0.5 – 2.3)    | 0.9 (0.5 – 1.0)    | 0.75    |
| Operated > 14 days after injury              | 12 (60)            | 3 (30)             | 0.12    |
| Days from injury to operation                | 14.0 (9.3 – 16.5)  | 12.0 (9.0 – 14.8)  | 0.50    |
| Patients with two operations                 | 3 (15)             | 1 (10)             | 1.00    |
| Antibiotic administration (before operation) | 13 (65)            | 3 (30)             | 0.12    |
| Antibiotic administration (after operation)  | 8 (40)             | 4 (40)             | 1.00    |
| Healing time, days from injury               | 28.0 (24.0 – 39.8) | 27.0 (26.0 – 40.3) | 0.98    |
| Days from operation to healing               | 14.0 (9.8 – 27.8)  | 14.5 (13.8 – 31.3) | 0.56    |
| Vascularity                                  | 1.5 (1.0 – 2.0)    | 2.0 (1.8 – 2.3)    | 0.16    |
| Pigmentation                                 | 3.0 (2.0 – 3.0)    | 2.0 (2.0 – 4.3)    | 1.00    |
| Thickness                                    | 2.0 (2.0 – 3.0)    | 2.5 (2.0 – 3.3)    | 0.78    |
| Relief                                       | 3.5 (3.0 – 4.0)    | 3.0 (2.0 – 3.0)    | 0.049   |
| Surface area                                 | 7.0 (6.0 – 8.0)    | 6.0 (4.0 – 8.3)    | 0.29    |
| Score sum                                    | 17.5 (14.3 – 19.8) | 16.5 (12.5 – 19.3) | 0.53    |

Data are presented as median (25th – 75th centile) and n (%). Mann Whitney U and Chi-squared or Fisher's exact test.

**Supplemental Table S4 – POSAS items and score sum by skin type**

|              | I                  | II                 | III-IV             | p     |
|--------------|--------------------|--------------------|--------------------|-------|
| Patients     | 5                  | 17                 | 8                  |       |
| Vascularity  | 2.0 (1.0 – 2.0)    | 2.0 (1.0 – 2.0)    | 1.5 (1.0 – 2.8)    | 0.90  |
| Pigmentation | 2.0 (2.0 – 2.5)    | 2.0 (2.0 – 3.0)    | 3.0 (2.3 – 3.8)    | 0.15* |
| Thickness    | 2.0 (2.0 – 3.0)    | 2.0 (2.0 – 3.0)    | 3.0 (2.0 – 3.8)    | 0.36  |
| Relief       | 3.0 (2.0 – 4.0)    | 3.0 (2.5 – 4.0)    | 3.0 (3.0 – 3.8)    | 0.94  |
| Surface area | 5.0 (4.0 – 7.5)    | 7.0 (5.0 – 8.5)    | 7.5 (6.0 – 8.8)    | 0.28  |
| Score sum    | 14.0 (12.0 – 18.0) | 17.0 (14.5 – 20.5) | 17.5 (16.0 – 19.8) | 0.32  |

POSAS values at 12 months' follow-up are presented as median (25th – 75th centile). Skin type classified according to the Fitzpatrick scale. Kruskal-Wallis ANOVA. \*Post hoc Mann-Whitney U test showed  $p=0.09$  for the difference in pigmentation between type I and type III-V.

**Supplemental Table S5 – POSAS score sum, median values by body site and a p value matrix**

|                 |                    | Trunk   | Upper extremity | Lower extremity |
|-----------------|--------------------|---------|-----------------|-----------------|
|                 | Score sum          | p value | p value         | p value         |
| Head and neck   | 16.0 (11.0 – 17.0) | 0.10    | 0.79            | 0.048           |
| Trunk           | 19.0 (18.0 – 21.0) |         | 0.047           | 0.78            |
| Upper extremity | 15.5 (13.3 – 17.8) | 0.047   |                 | 0.009           |
| Lower extremity | 20.0 (17.3 – 23.8) | 0.78    | 0.009           |                 |

POSAS score sum at 12 months follow-up are presented as median (25th – 75th centile).

Kruskal-Wallis ANOVA  $p=0.02$ . Post hoc analysis was done with the Mann-Whitney U test, not corrected for repeated analysis.

**Supplemental Table S6 – POSAS items and score sum by body site**

|              | Upper extremity    | Trunk              | Lower extremity    | Head and neck      | p    |
|--------------|--------------------|--------------------|--------------------|--------------------|------|
| Patients     | 16 (53)            | 3 (10)             | 8 (27)             | 3 (10)             |      |
| Vascularity  | 1.0 (1.0 – 2.0)    | 2.0 (2.0 – 2.0)    | 2.0 (1.3 – 3.0)    | 2.0 (1.0 – 2.0)    | 0.18 |
| Pigmentation | 2.0 (2.0 – 3.0)    | 2.0 (2.0 – 3.0)    | 3.5 (3.0 – 4.8)    | 2.0 (2.0 – 2.0)    | 0.15 |
| Thickness    | 2.0 (2.0 – 3.0)    | 2.0 (2.0 – 3.0)    | 3.0 (2.3 – 4.5)    | 2.0 (2.0 – 2.0)    | 0.14 |
| Relief       | 3.0 (2.3 – 4.0)    | 4.0 (4.0 – 4.0)    | 3.0 (2.3 – 3.8)    | 3.0 (2.0 – 3.0)    | 0.16 |
| Surface area | 6.5 (4.3 – 7.8)    | 8.0 (8.0 – 10.0)   | 9.0 (6.0 – 9.0)    | 7.0 (4.0 – 8.0)    | 0.03 |
| Score sum    | 15.5 (13.3 – 17.8) | 19.0 (18.0 – 21.0) | 20.0 (17.3 – 23.8) | 16.0 (11.0 – 17.0) | 0.02 |

POSAS values at 12 months' follow-up are presented as median (25th – 75th centile). Kruskal-Wallis ANOVA. \*Post hoc Mann-Whitney U test showed  $p=0.02$  for the difference in surface between Upper and Lower extremity, and between Upper extremity and Trunk. The post hoc differences in score sum were  $p=0.009$  between Upper and Lower extremity,  $p=0.047$  between Upper extremity and trunk, and  $p=0.048$  between Lower extremity and Head and neck.

**Supplemental Table S7 – Dropout analysis, a comparison between the “did not return cohort” and the study group**

|                                              | Drop outs          | Scar follow-up     | P value |
|----------------------------------------------|--------------------|--------------------|---------|
| Patients                                     | 45                 | 30                 |         |
| Age, years                                   | 1.9 (1.3 – 9.2)    | 3.9 (1.5 – 11.6)   | 0.31    |
| Male sex                                     | 28 (62)            | 16 (53)            | 0.44    |
| Burn type:                                   |                    |                    | 0.69    |
| Scald                                        | 26 (58)            | 20 (67)            |         |
| Contact burn                                 | 10 (22)            | 6 (20)             |         |
| Flame burn                                   | 9 (20)             | 4 (13)             |         |
| Burn size, BSA%                              | 3.0 (1.5 – 9.0)    | 4.8 (0.8 – 7.1)    | 0.87    |
| Superficial dermal burn, BSA%                | 1.5 (0.0 – 3.8)    | 2.8 (0.0 – 5.1)    | 0.55    |
| Deep dermal burn, BSA%                       | 1.0 (0.0 – 2.3)    | 0.9 (0.1 – 2.0)    | 0.97    |
| Full thickness burn, BSA%                    | 0.0 (0.0 – 0.4)    | 0.0 (0.0 – 0.0)    | 0.10    |
| Deep dermal and full thickness burn, BSA%    | 1.0 (0.3 – 2.5)    | 1.0 (0.3 – 2.1)    | 1.00    |
| Operated and skin grafted area, BSA%         | 1.0 (0.5 – 1.5)    | 0.8 (0.5 – 1.1)    | 0.82    |
| Operated > 14 days after injury              | 22 (49)            | 15 (50)            | 0.93    |
| Days from injury to operation                | 13.0 (7.5 – 18.0)  | 13.5 (9.8 – 15.5)  | 0.82    |
| Patients with two operations                 | 4 (9)              | 4 (13)             | 0.71    |
| Antibiotic administration (before operation) | 23 (51)            | 16 (53)            | 0.84    |
| Antibiotic administration (after operation)  | 22 (49)            | 12 (40)            | 0.26    |
| Healing time, days from injury               | 29.0 (21.5 – 35.5) | 28.0 (25.5 – 40.0) | 0.26    |
| Days from operation to healing               | 16.0 (9.0 – 20.5)  | 14.0 (12.8 – 28.8) | 0.31    |

Data are presented as median (25th – 75th centile) and n (%). Mann Whitney U and Chi-squared tests.
